# Supplementary material for: Inhibition of the prolyl isomerase Pin1 improves endothelial function and attenuates vascular remodelling in pulmonary hypertension by inhibiting TGF-β signalling
Source: PubMed Central journal article supplement (PMC8813847; doi:10.1007/s10456-021-09812-7), 2021-08-11

Figure S4

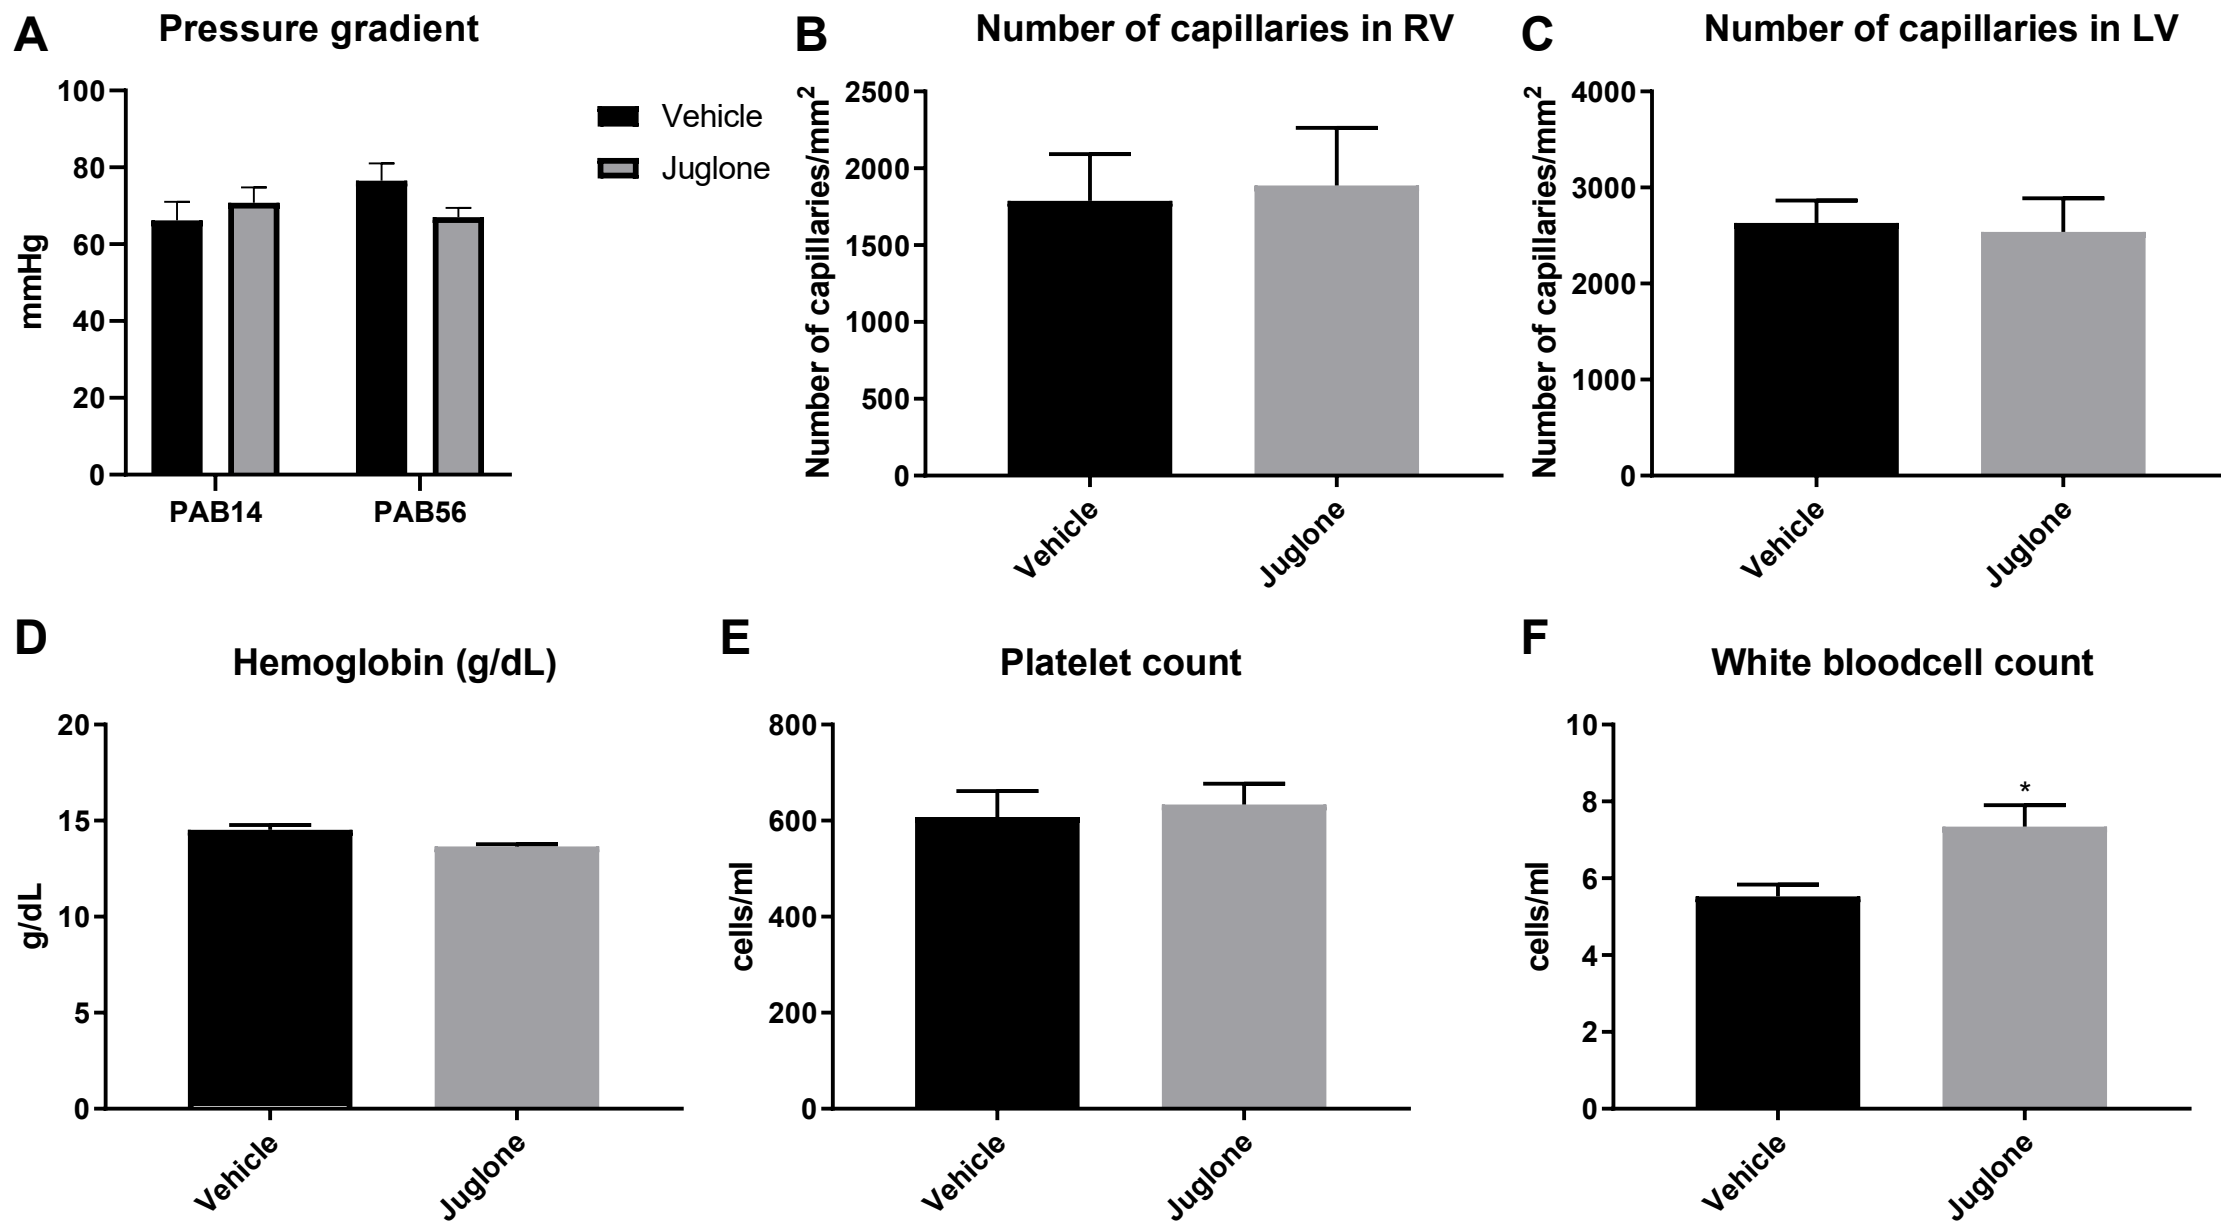

Supplement: 10456_2021_9812_MOESM4_ESM.pdf [file 10456_2021_9812_MOESM4_ESM.pdf]
